# Supplementary material for: Non-enzymatic colorimetric detection of hydrogen peroxide using a μPAD coupled with a machine learning-based smartphone app
Source: Royal Society of Chemistry journal article supplement (doi:10.1039/d1an01888d), 2021-01-01
Supplement: d1an01888d1.pdf [file d1an01888d1.pdf]

## Supplementary Data

# Non-enzymatic colorimetric detection of hydrogen peroxide using a $\mu$ PAD coupled with a machine learning-based smartphone app

Vakkas Doğan<sup>a</sup>, Elif Yüzer<sup>b</sup>, Volkan Kılıç<sup>a,\*</sup>, Mustafa Şen<sup>b,\*</sup>

<sup>a</sup>Electrical and Electronics Engineering Graduate Program, Izmir Katip Celebi University, Izmir, Turkey

<sup>b</sup>Department of Biomedical Engineering, Izmir Katip Celebi University, Izmir, Turkey

**\*Corresponding author**

Email addresses: [volkan.kilic@ikcu.edu.tr](mailto:volkan.kilic@ikcu.edu.tr) (Volkan Kılıç), [mustafa.sen@ikcu.edu.tr](mailto:mustafa.sen@ikcu.edu.tr) (Mustafa Şen)

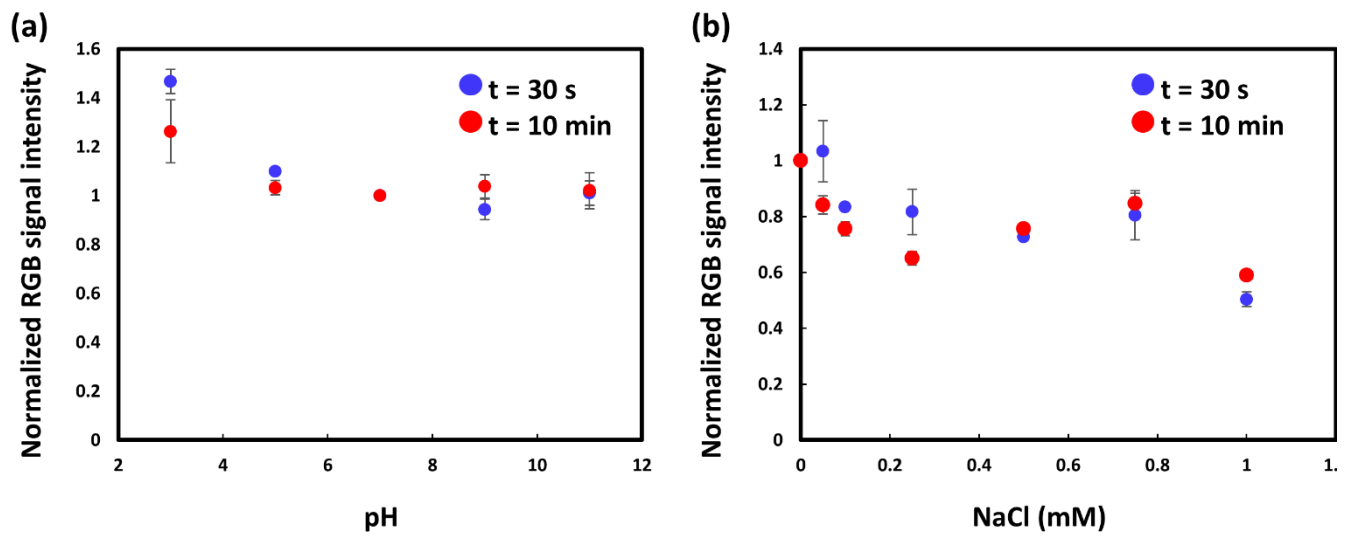

Fig. S1: pH (a) and NaCl (b) dependent behaviour of  $\mu$ PAD.

**Table S1.** Evaluation of the LDA for KI at t=30 s in terms of precision, recall and F1 score.

|                | precision   | recall      | F1-score    |
|----------------|-------------|-------------|-------------|
| <b>0 mM</b>    | 0.79        | 0.71        | 0.73        |
| <b>0.01 mM</b> | 0.78        | 0.82        | 0.72        |
| <b>0.05 mM</b> | 0.59        | 0.61        | 0.62        |
| <b>0.1 mM</b>  | 0.64        | 0.67        | 0.65        |
| <b>0.2 mM</b>  | 0.88        | 0.82        | 0.78        |
| <b>0.5 mM</b>  | 0.9         | 0.88        | 1           |
| <b>1 mM</b>    | 0.83        | 0.71        | 0.77        |
| <b>5 mM</b>    | 0.97        | 1           | 1           |
| <b>10 mM</b>   | 0.9         | 0.84        | 0.91        |
| <b>25 mM</b>   | 0.88        | 1           | 1           |
| <b>50 mM</b>   | 1           | 1           | 1           |
| <b>Average</b> | <b>0.83</b> | <b>0.82</b> | <b>0.84</b> |

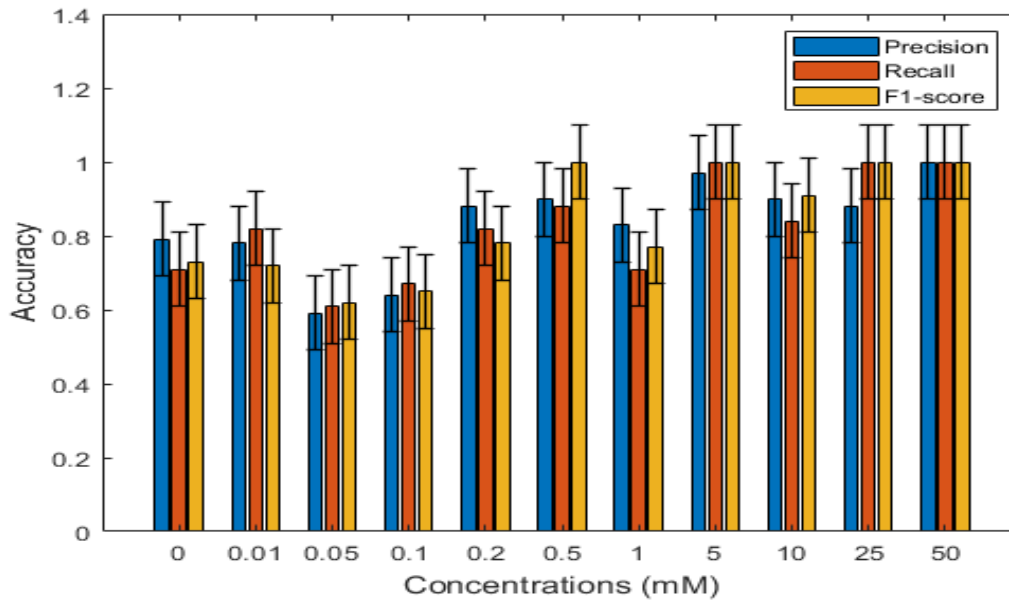

**Fig. S2:** Evaluation of LDA with error bars in terms of precision, recall, and F1 score at t=30 s for TMB+KI.

**Table S2.** Evaluation of the LDA for KI at t=30 s in terms of precision, recall and F1 score.

|                | precision   | recall      | F1-score    |
|----------------|-------------|-------------|-------------|
| <b>0 mM</b>    | 0.92        | 0.79        | 0.85        |
| <b>0.01 mM</b> | 0.87        | 0.9         | 0.9         |
| <b>0.5 mM</b>  | 0.93        | 1           | 0.88        |
| <b>1 mM</b>    | 0.97        | 0.92        | 0.91        |
| <b>5 mM</b>    | 0.94        | 1           | 1           |
| <b>10 mM</b>   | 0.9         | 0.91        | 0.98        |
| <b>25 mM</b>   | 1           | 1           | 1           |
| <b>50 mM</b>   | 0.92        | 0.96        | 0.98        |
| <b>Average</b> | <b>0.93</b> | <b>0.94</b> | <b>0.94</b> |

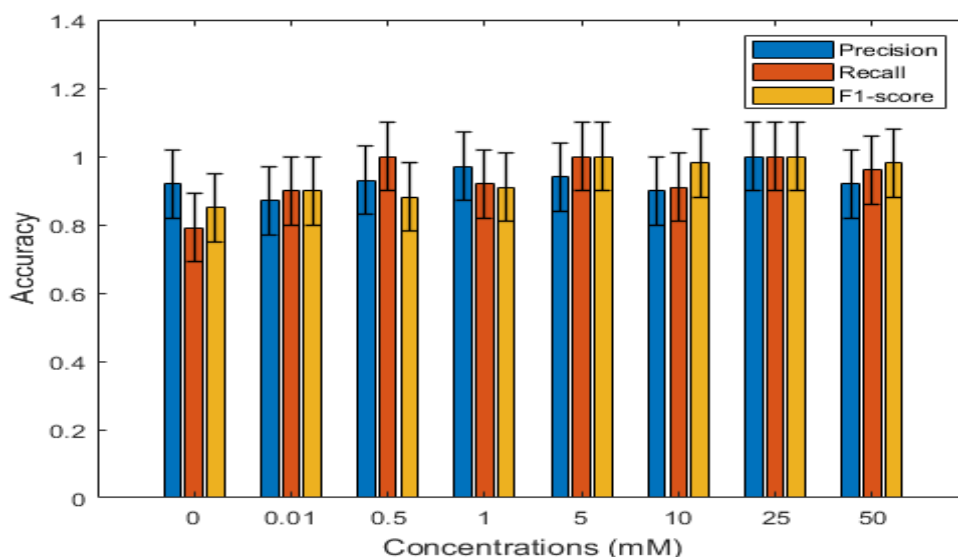

**Fig. S3:** Evaluation of LDA with error bars in terms of precision, recall, and F1 score at t=30 s for TMB+KI.

**Table S3.** Evaluation of the LDA for KI at t=10 min in terms of precision, recall and F1 score.

|                | precision   | recall      | F1-score    |
|----------------|-------------|-------------|-------------|
| <b>0 mM</b>    | 0.83        | 0.68        | 0.73        |
| <b>0.01 mM</b> | 0.86        | 0.86        | 0.86        |
| <b>0.05 mM</b> | 0.77        | 0.86        | 0.81        |
| <b>0.1 mM</b>  | 0.81        | 0.79        | 0.8         |
| <b>0.2 mM</b>  | 0.88        | 0.93        | 0.88        |
| <b>0.5 mM</b>  | 0.9         | 0.96        | 0.95        |
| <b>1 mM</b>    | 0.96        | 0.93        | 0.95        |
| <b>5 mM</b>    | 1           | 0.89        | 0.94        |
| <b>10 mM</b>   | 0.81        | 0.89        | 0.85        |
| <b>25 mM</b>   | 0.96        | 0.93        | 0.95        |
| <b>50 mM</b>   | 0.9         | 0.93        | 0.91        |
| <b>Average</b> | <b>0.88</b> | <b>0.88</b> | <b>0.88</b> |

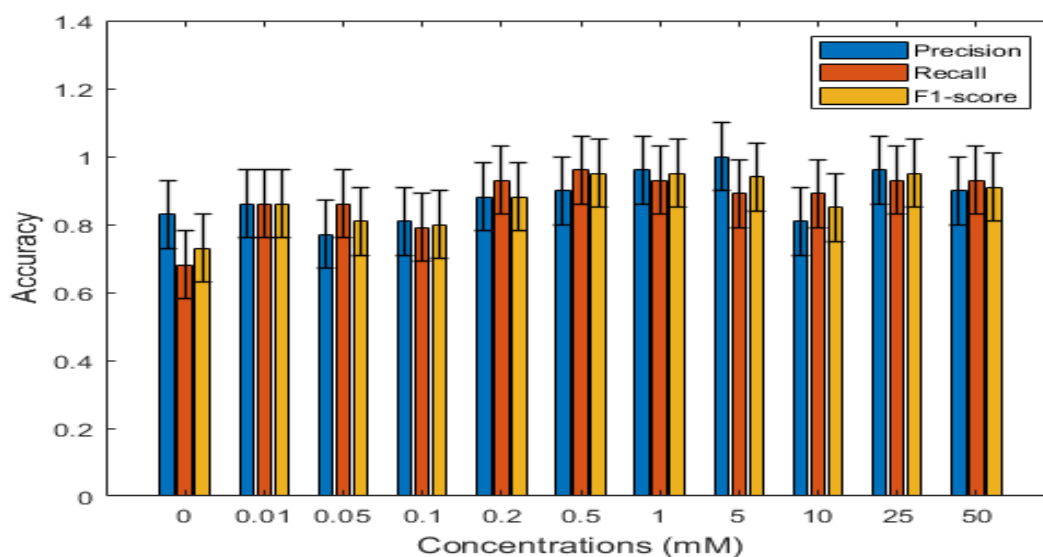

**Fig. S4:** Evaluation of LDA with error bars in terms of precision, recall, and F1 score at t=10 min for TMB+KI.

**Table S4.** Evaluation of the LDA for KI at t=10 min in terms of precision, recall and F1 score.

|                | precision   | recall      | F1-score    |
|----------------|-------------|-------------|-------------|
| <b>0 mM</b>    | 0.96        | 0.82        | 0.88        |
| <b>0.01 mM</b> | 0.9         | 0.93        | 0.91        |
| <b>0.5 mM</b>  | 0.93        | 0.96        | 0.95        |
| <b>1 mM</b>    | 0.93        | 0.93        | 0.93        |
| <b>5 mM</b>    | 1           | 1           | 1           |
| <b>10 mM</b>   | 0.9         | 0.89        | 0.89        |
| <b>25 mM</b>   | 0.93        | 0.93        | 0.93        |
| <b>50 mM</b>   | 0.84        | 0.96        | 0.9         |
| <b>Average</b> | <b>0.92</b> | <b>0.93</b> | <b>0.92</b> |

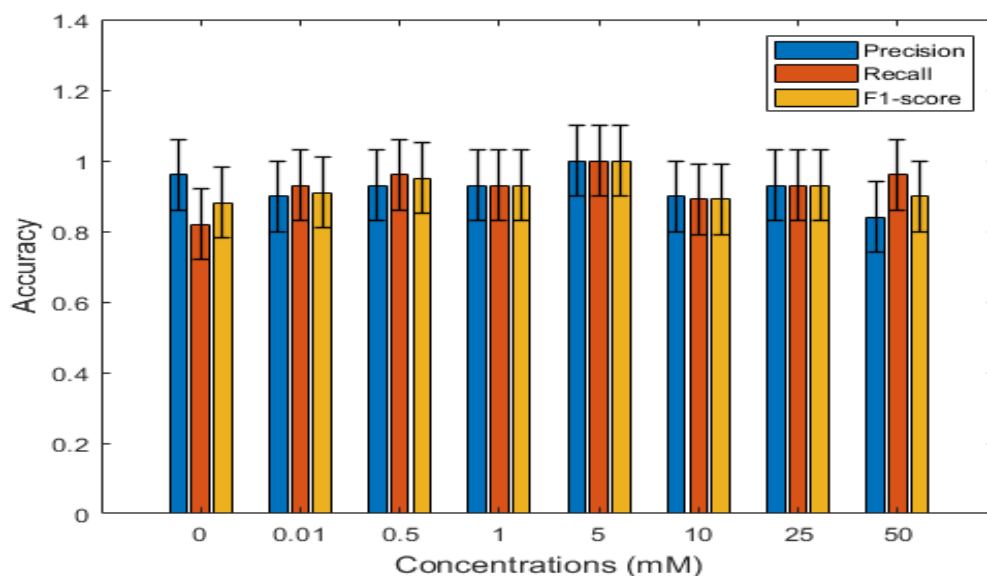

**Fig. S5:** Evaluation of LDA with error bars in terms of precision, recall, and F1 score at t=10 min for TMB+KI.

**Table S5.** Evaluation of the EBC for TMB+KI at t=30 s in terms of precision, recall and F1 score.

|                | precision   | recall      | F1-score    |
|----------------|-------------|-------------|-------------|
| <b>0 mM</b>    | 0.96        | 0.96        | 0.96        |
| <b>0.01 mM</b> | 0.9         | 0.93        | 0.91        |
| <b>0.05 mM</b> | 0.96        | 0.93        | 0.95        |
| <b>0.1 mM</b>  | 0.97        | 1           | 0.98        |
| <b>0.2 mM</b>  | 0.96        | 0.96        | 0.96        |
| <b>0.5 mM</b>  | 1           | 1           | 1           |
| <b>1 mM</b>    | 0.96        | 0.93        | 0.95        |
| <b>5 mM</b>    | 0.88        | 0.86        | 0.81        |
| <b>10 mM</b>   | 0.85        | 0.92        | 0.86        |
| <b>25 mM</b>   | 0.88        | 0.84        | 0.8         |
| <b>50 mM</b>   | 0.81        | 0.72        | 0.77        |
| <b>Average</b> | <b>0.92</b> | <b>0.92</b> | <b>0.91</b> |

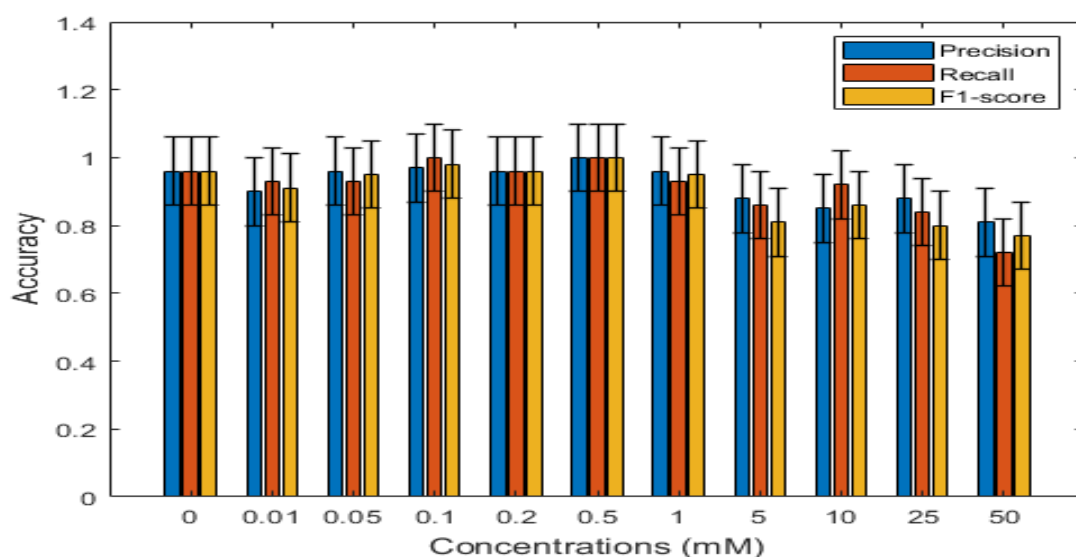

**Fig. S6:** Evaluation of EBC with error bars in terms of precision, recall, and F1 score at t=30 s for TMB+KI.

**Table S6.** Evaluation of the EBC for TMB+KI at t=30 s in terms of precision, recall and F1 score.

|                | precision   | recall      | F1-score    |
|----------------|-------------|-------------|-------------|
| <b>0 mM</b>    | 0.96        | 0.96        | 0.96        |
| <b>0.01 mM</b> | 0.81        | 0.93        | 0.87        |
| <b>0.05 mM</b> | 0.96        | 0.82        | 0.88        |
| <b>0.1 mM</b>  | 1           | 1           | 1           |
| <b>0.2 mM</b>  | 1           | 1           | 1           |
| <b>0.5 mM</b>  | 1           | 1           | 1           |
| <b>1 mM</b>    | 1           | 1           | 1           |
| <b>5 mM</b>    | 1           | 1           | 1           |
| <b>Average</b> | <b>0.97</b> | <b>0.96</b> | <b>0.96</b> |

**Table S7.** Evaluation of the EBC for TMB+KI at t=10 min in terms of precision, recall and F1 score.

|                | precision   | recall      | F1-score    |
|----------------|-------------|-------------|-------------|
| <b>0 mM</b>    | 0.96        | 0.98        | 0.96        |
| <b>0.01 mM</b> | 0.86        | 0.86        | 0.86        |
| <b>0.05 mM</b> | 0.96        | 0.86        | 0.81        |
| <b>0.1 mM</b>  | 0.96        | 0.96        | 0.96        |
| <b>0.2 mM</b>  | 0.96        | 0.93        | 0.88        |
| <b>0.5 mM</b>  | 0.96        | 0.96        | 0.95        |
| <b>1 mM</b>    | 1           | 1           | 1           |
| <b>5 mM</b>    | 0.7         | 0.74        | 0.78        |
| <b>10 mM</b>   | 0.9         | 0.89        | 0.85        |
| <b>25 mM</b>   | 0.45        | 0.52        | 0.58        |
| <b>50 mM</b>   | 0.68        | 0.72        | 0.65        |
| <b>Average</b> | <b>0.85</b> | <b>0.86</b> | <b>0.84</b> |

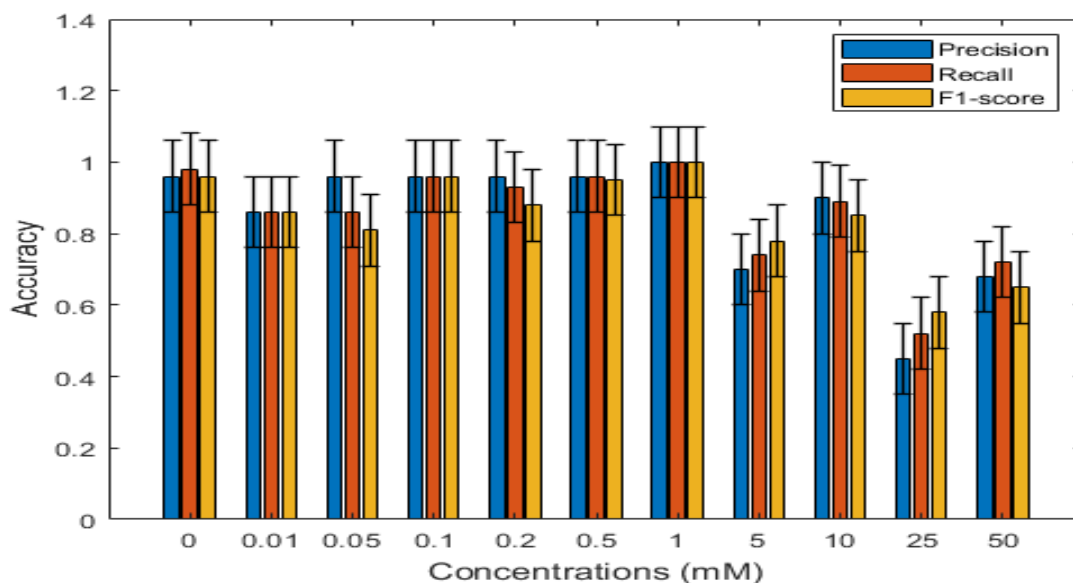

**Fig. S7:** Evaluation of EBC with error bars in terms of precision, recall, and F1 score at t=10 min for TMB+KI.

**Table S8.** Evaluation of the EBC for TMB+KI at t=10 min in terms of precision, recall and F1 score.

|                | precision   | recall      | F1-score    |
|----------------|-------------|-------------|-------------|
| <b>0 mM</b>    | 0.98        | 0.96        | 0.96        |
| <b>0.01 mM</b> | 0.92        | 0.93        | 0.91        |
| <b>0.05 mM</b> | 0.92        | 0.89        | 0.91        |
| <b>0.1 mM</b>  | 0.98        | 0.96        | 0.96        |
| <b>0.2 mM</b>  | 0.98        | 0.98        | 0.98        |
| <b>0.5 mM</b>  | 1           | 1           | 1           |
| <b>1 mM</b>    | 0.94        | 0.93        | 0.93        |
| <b>5 mM</b>    | 1           | 1           | 1           |
| <b>Average</b> | <b>0.97</b> | <b>0.96</b> | <b>0.96</b> |

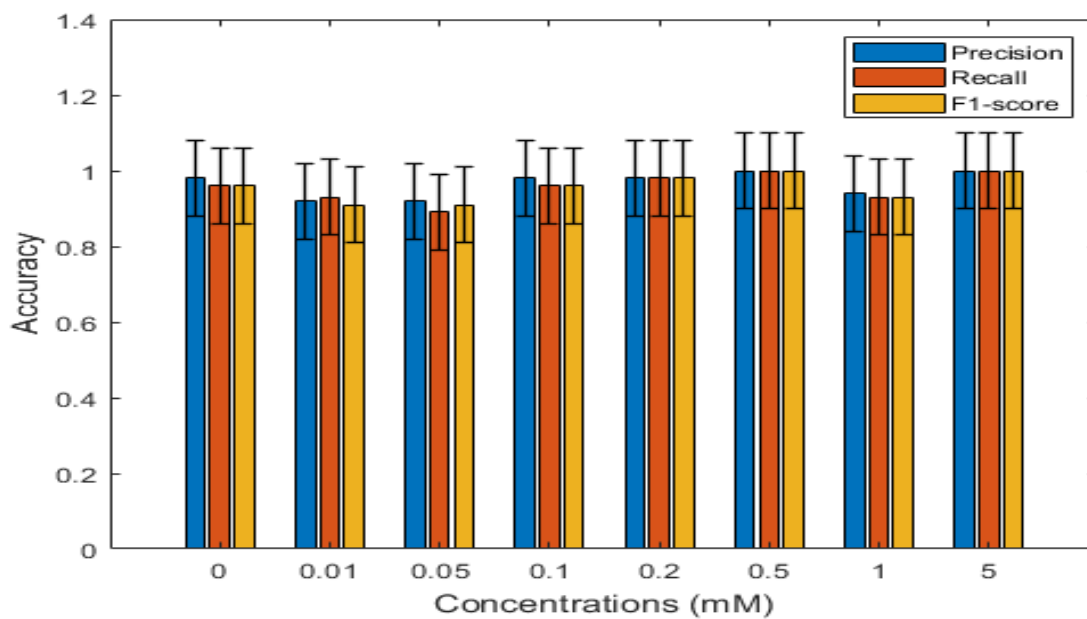

**Fig. S8:** Evaluation of EBC with error bars in terms of precision, recall, and F1 score at t=10 min for TMB+KI.

### KI- Concentration: 0-50 mM (t=30 s)

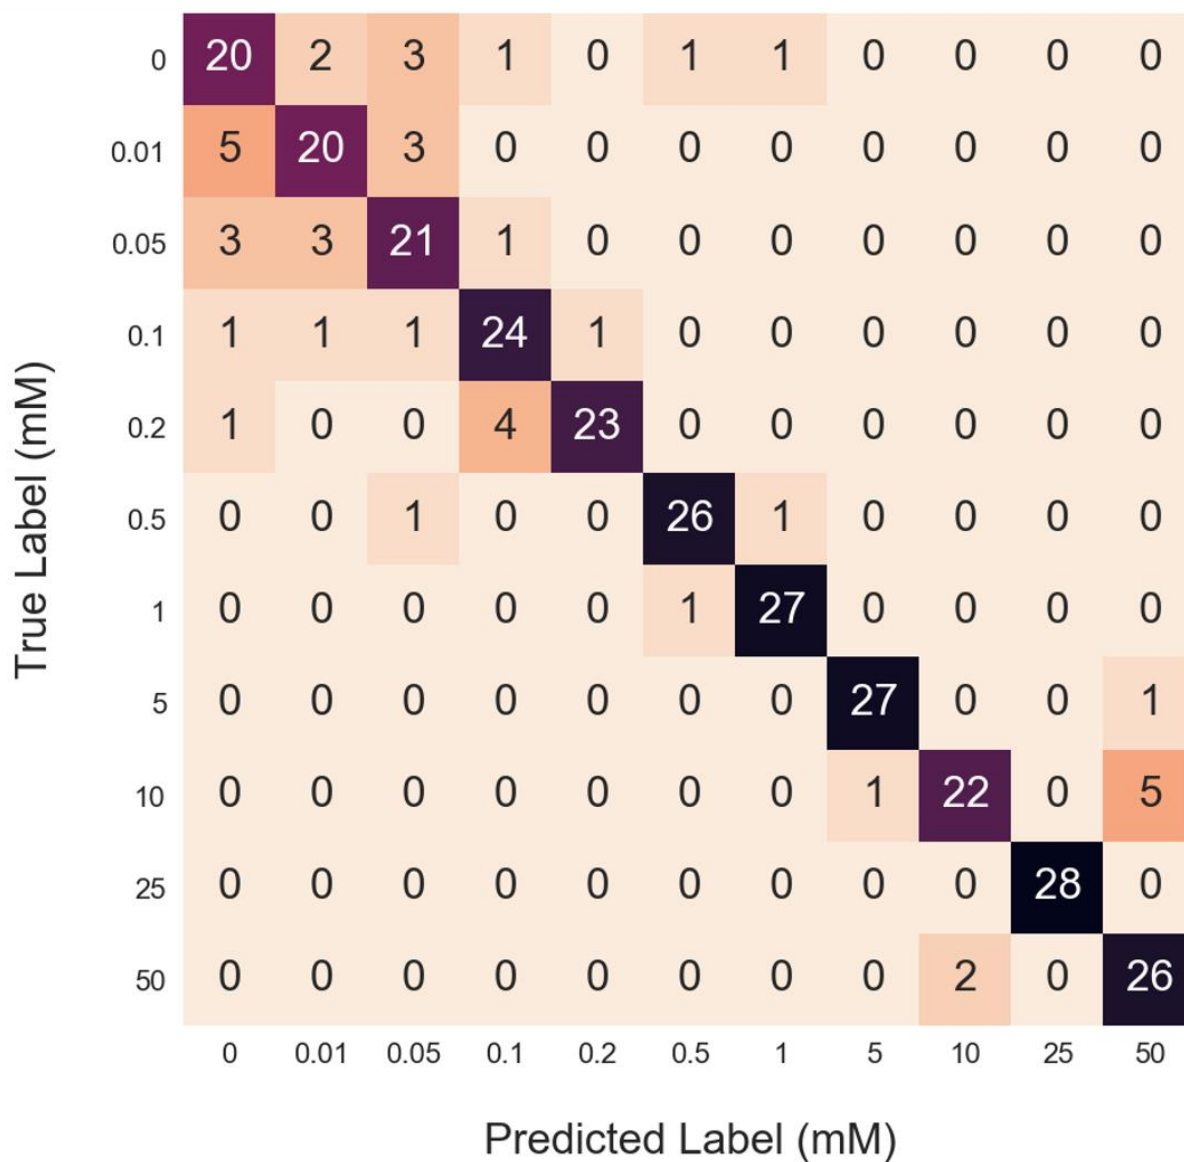

**Fig. S9:** Confusion matrix of KI at t=30 s for the LDA classifier including 0-50 mM concentration.



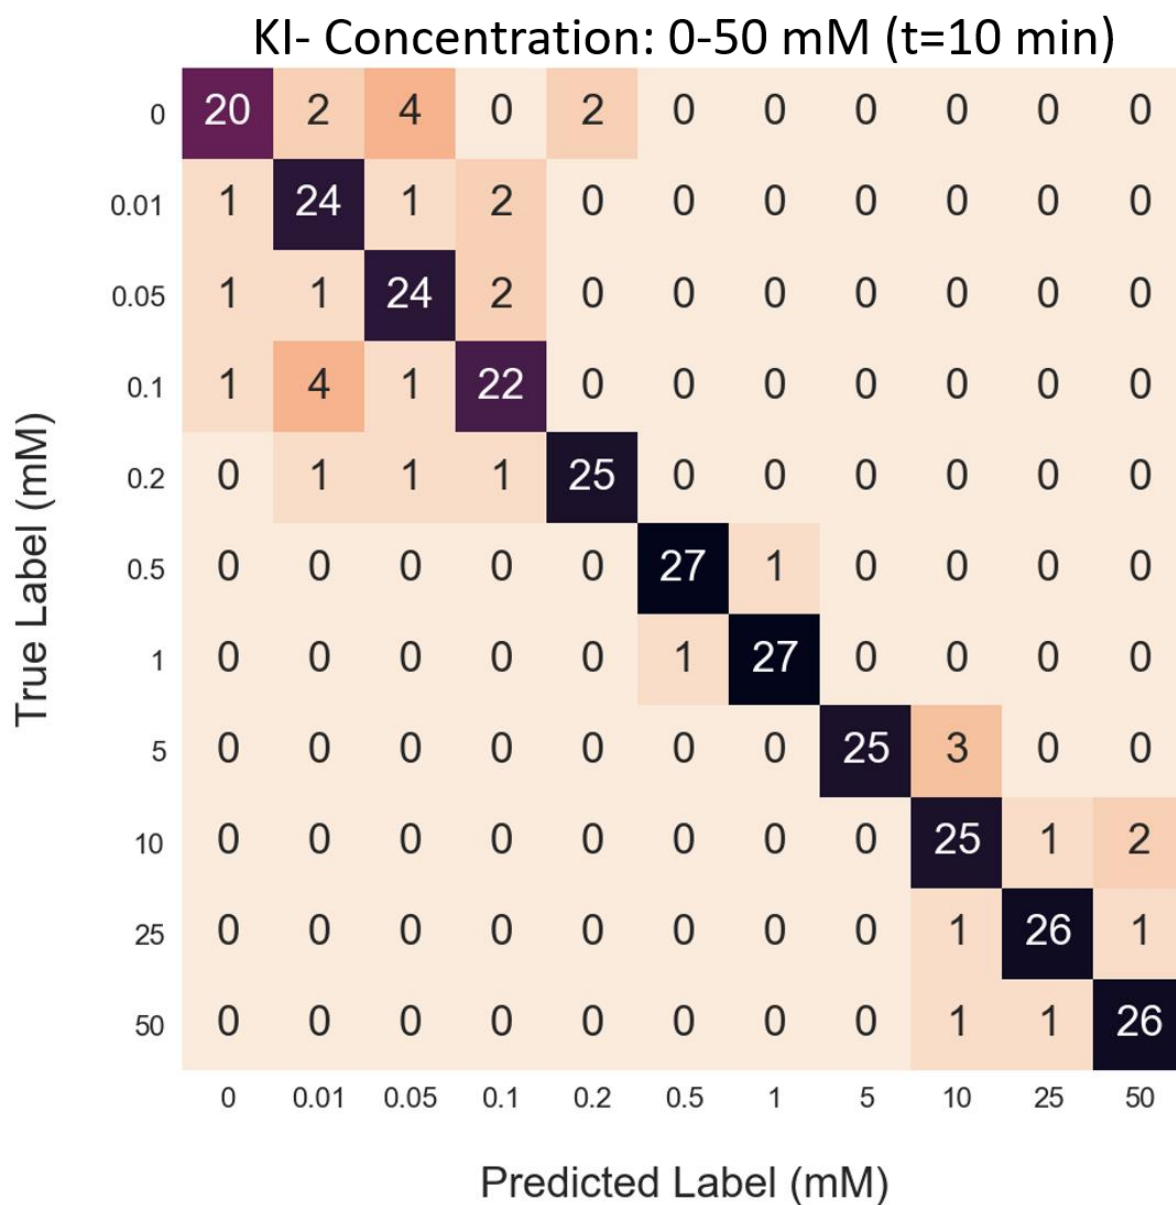

**Fig. S10:** Confusion matrix of KI at t=10 min for the LDA classifier including 0-50 mM concentration.

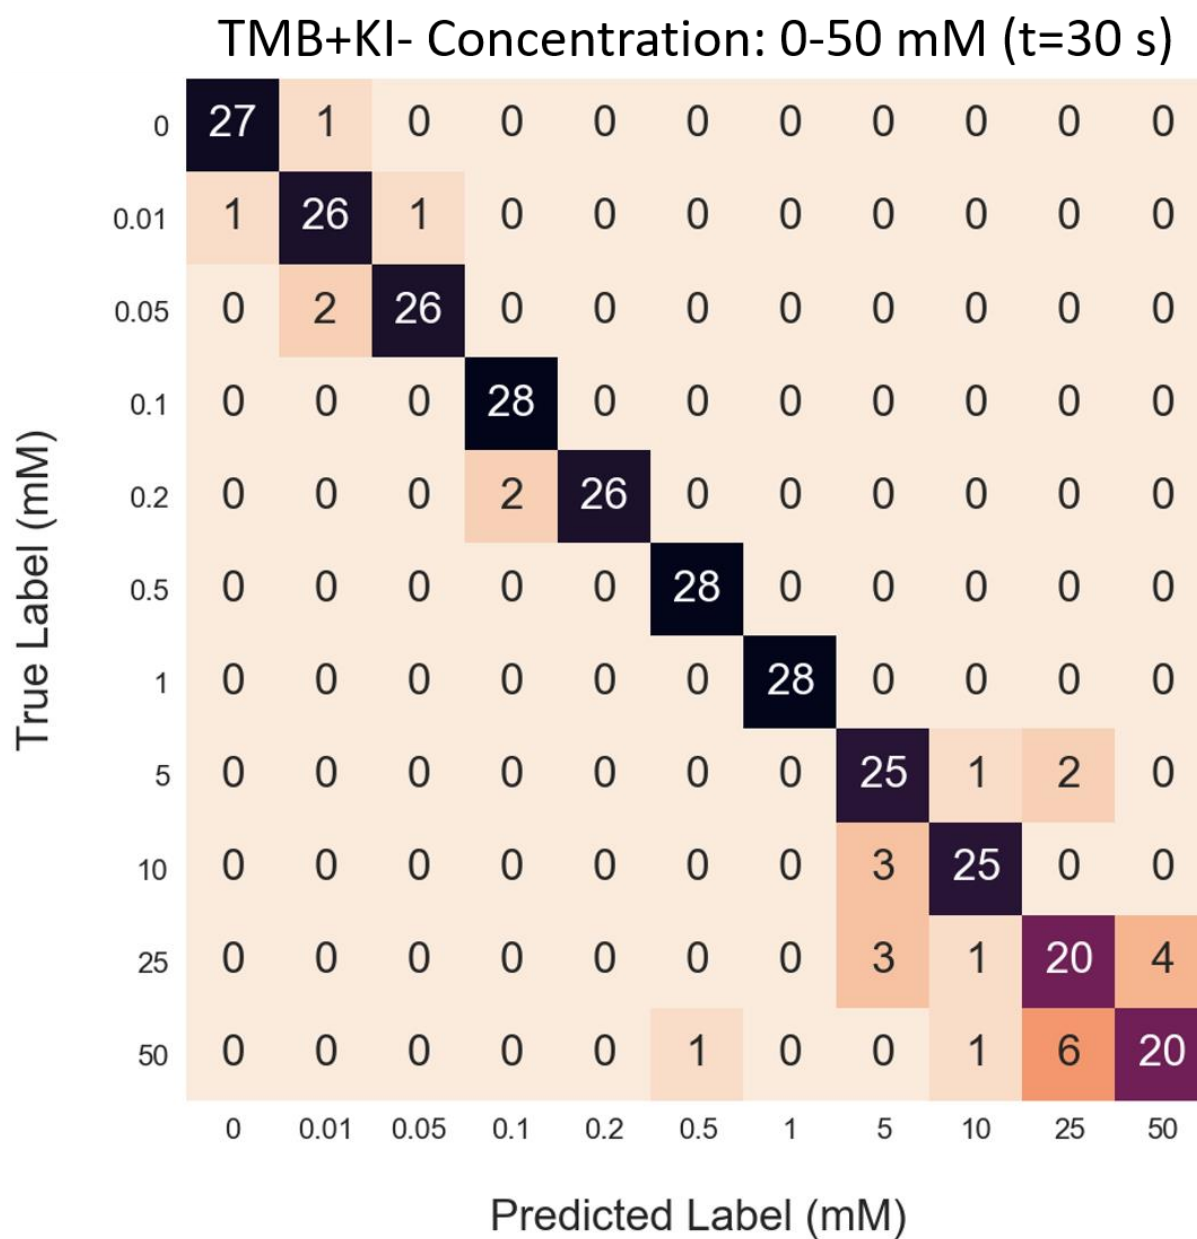

**Fig. S11:** Confusion matrix of TMB+KI at t=30 s for the EBC classifier including 0-50 mM concentration.

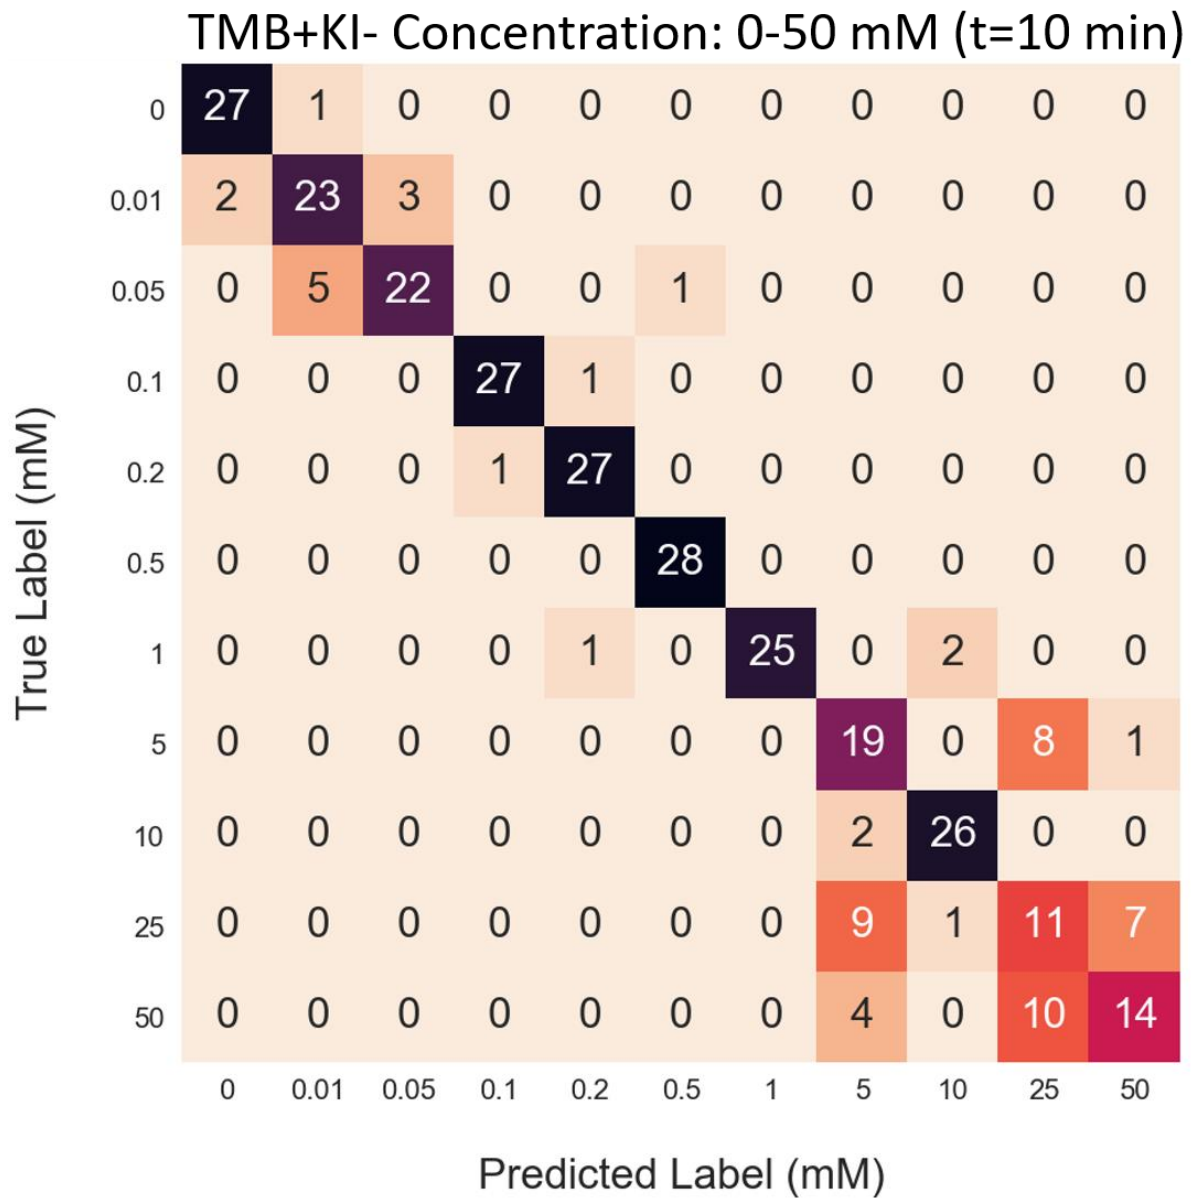

**Fig. S12:** Confusion matrix of TMB+KI at t=10 min for the EBC classifier including 0-50 mM concentration.
